# Supplementary material for: Optimizing an Injectable Composite Oxygen-Generating System for Relieving Tissue Hypoxia
Source: Front Bioeng Biotechnol. 2020 May 26;8:511. doi: 10.3389/fbioe.2020.00511 (PMC7264163; doi:10.3389/fbioe.2020.00511)
Supplement: Supplementary file 1 [file Data_Sheet_1.docx]

Supplementary Material

## Supplementary Figure


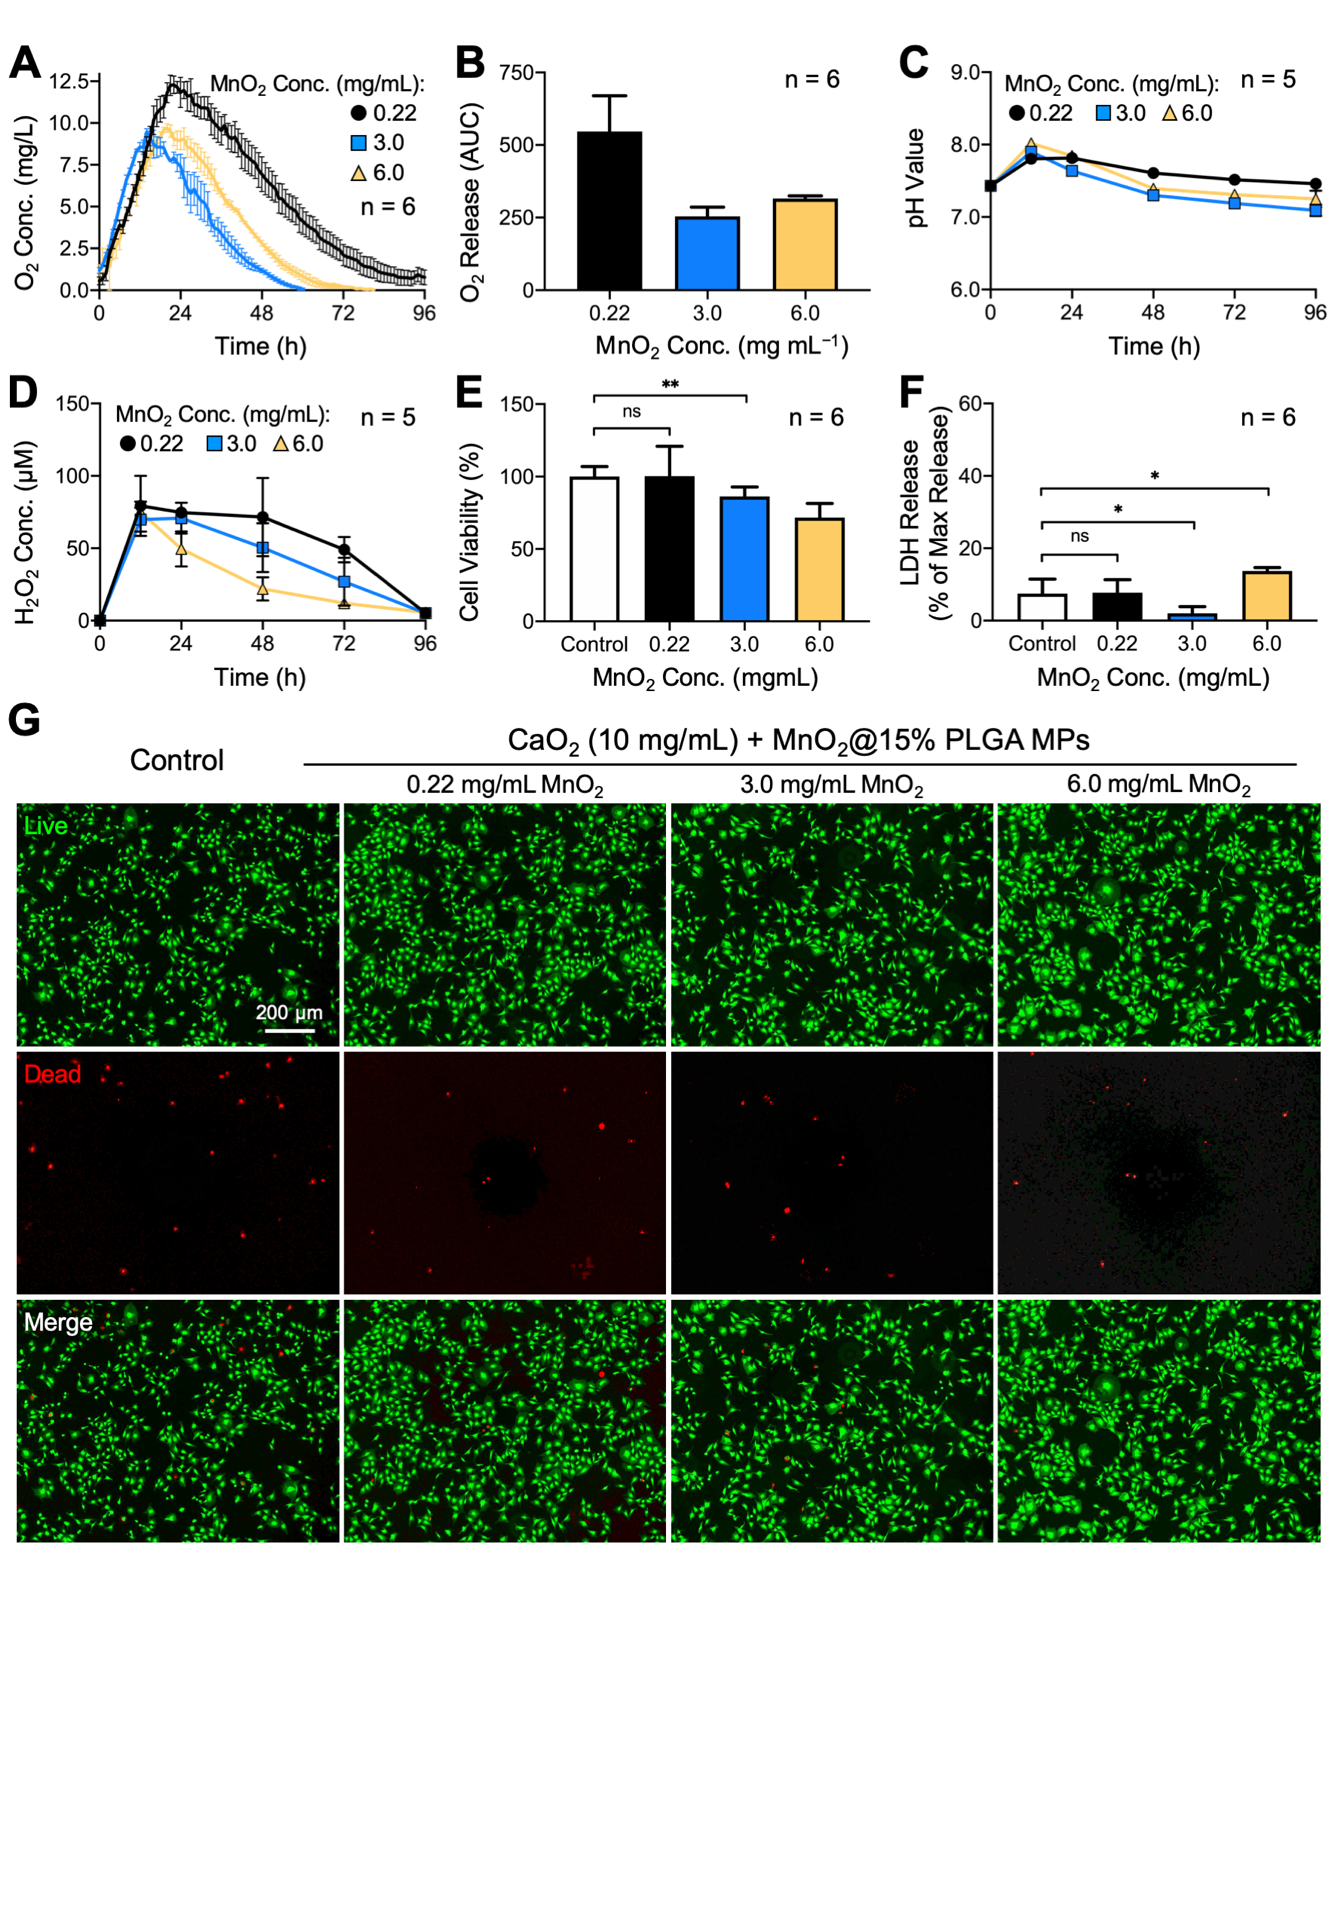


**Supplementary Figure 1.** Effects of the amount of encapsulated MnO2 on the oxygen release behavior of CaO2 + MnO2@PLGA MPs. (a) The release profiles and (b) corresponding AUCs of oxygen release from MPs. (c) Variation in pH and (d) accumulation of H2O2 in PBS samples following treatment with MPs. (e) Results of the CCK-8 assay, (f) LDH assay, and (g) live/dead staining following treatment with MPs. **p* < 0.05; ***p* < 0.01; ns, not significant.


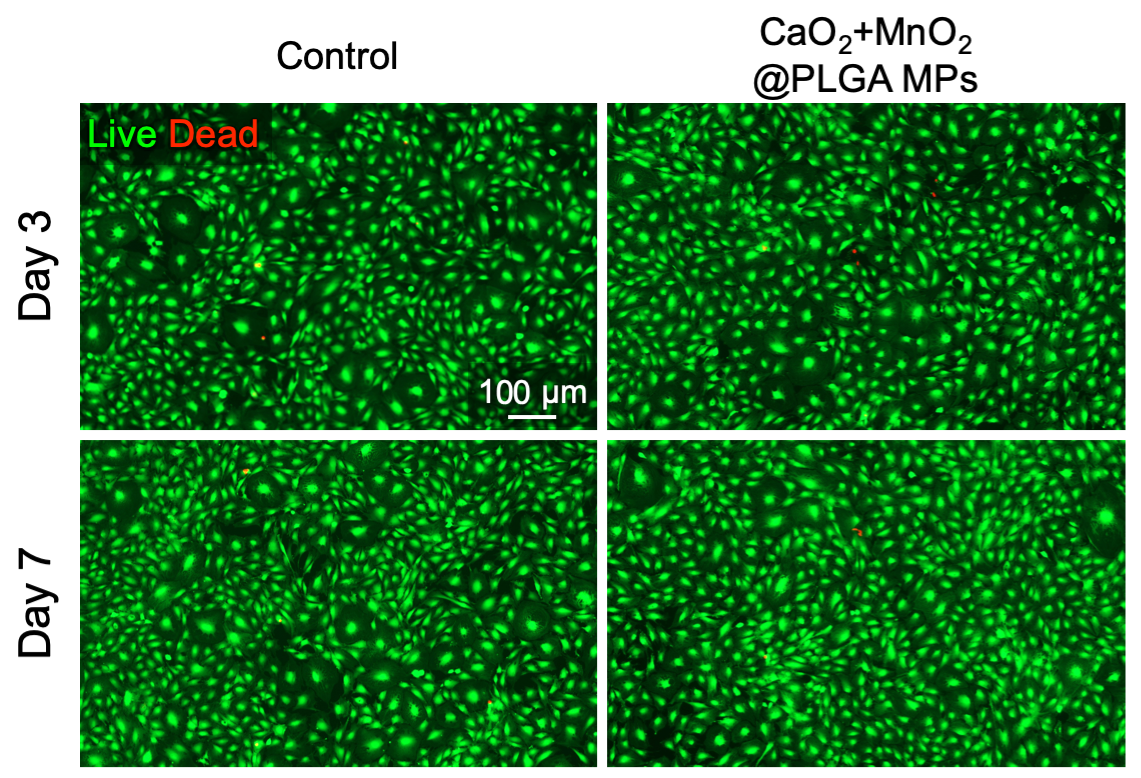


**Supplementary Figure 2.** Representative live/dead images of the MC3T3-E1 cells receiving the developed CaO2 + MnO2@PLGA MPs for 3 or 7 days.
